# Supplementary material for: Predicting Selective Serotonin Re-Uptake Inhibitors Potency: Machine Learning and Molecular Docking Approach
Source: Research Square preprint supplement (doi:10.21203/rs.3.rs-6160025/v1), 2025-03-14
Supplement: Supplementary file 1 [file affecbbbc591a16955e90a35.docx]

**SUPPLEMENTARY INFORMATION**


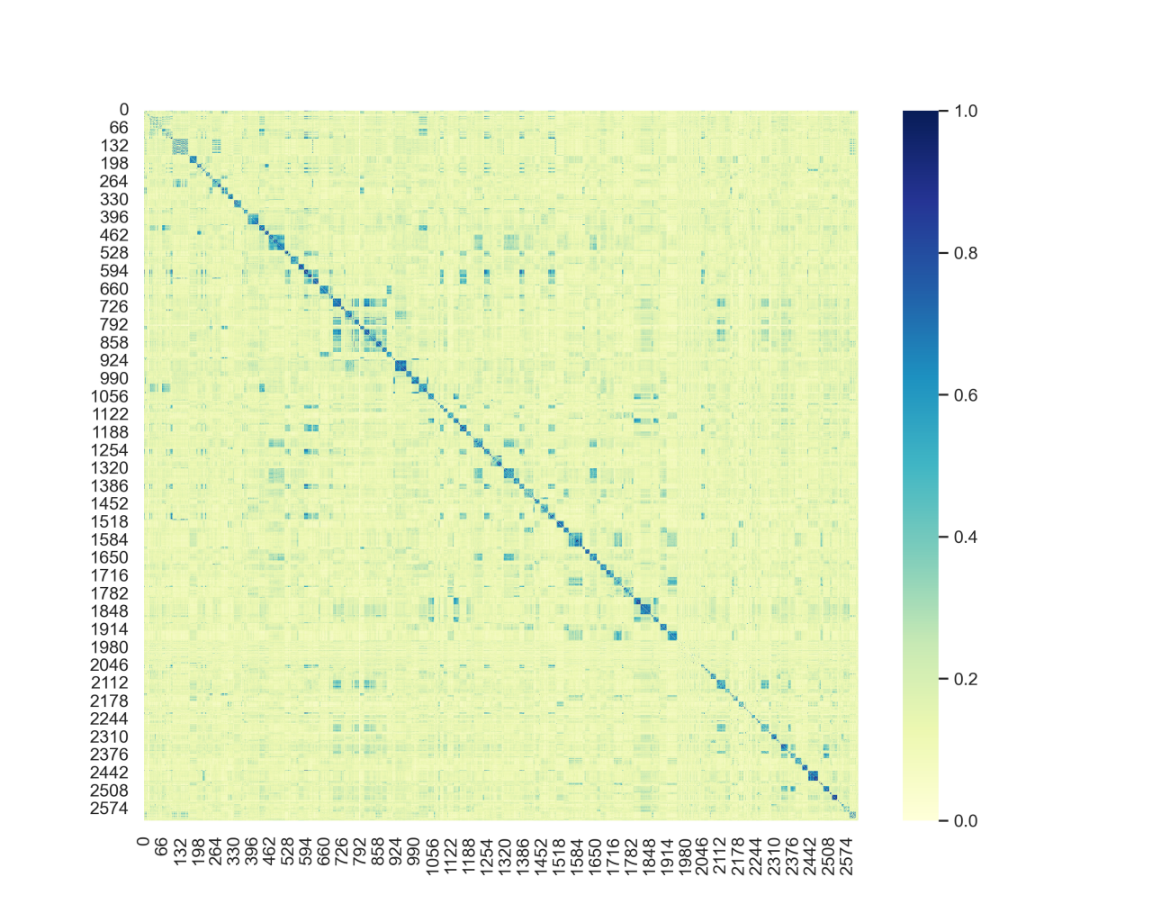


Figure S1: Heatmap representing the similarity matrix of SSRIs.


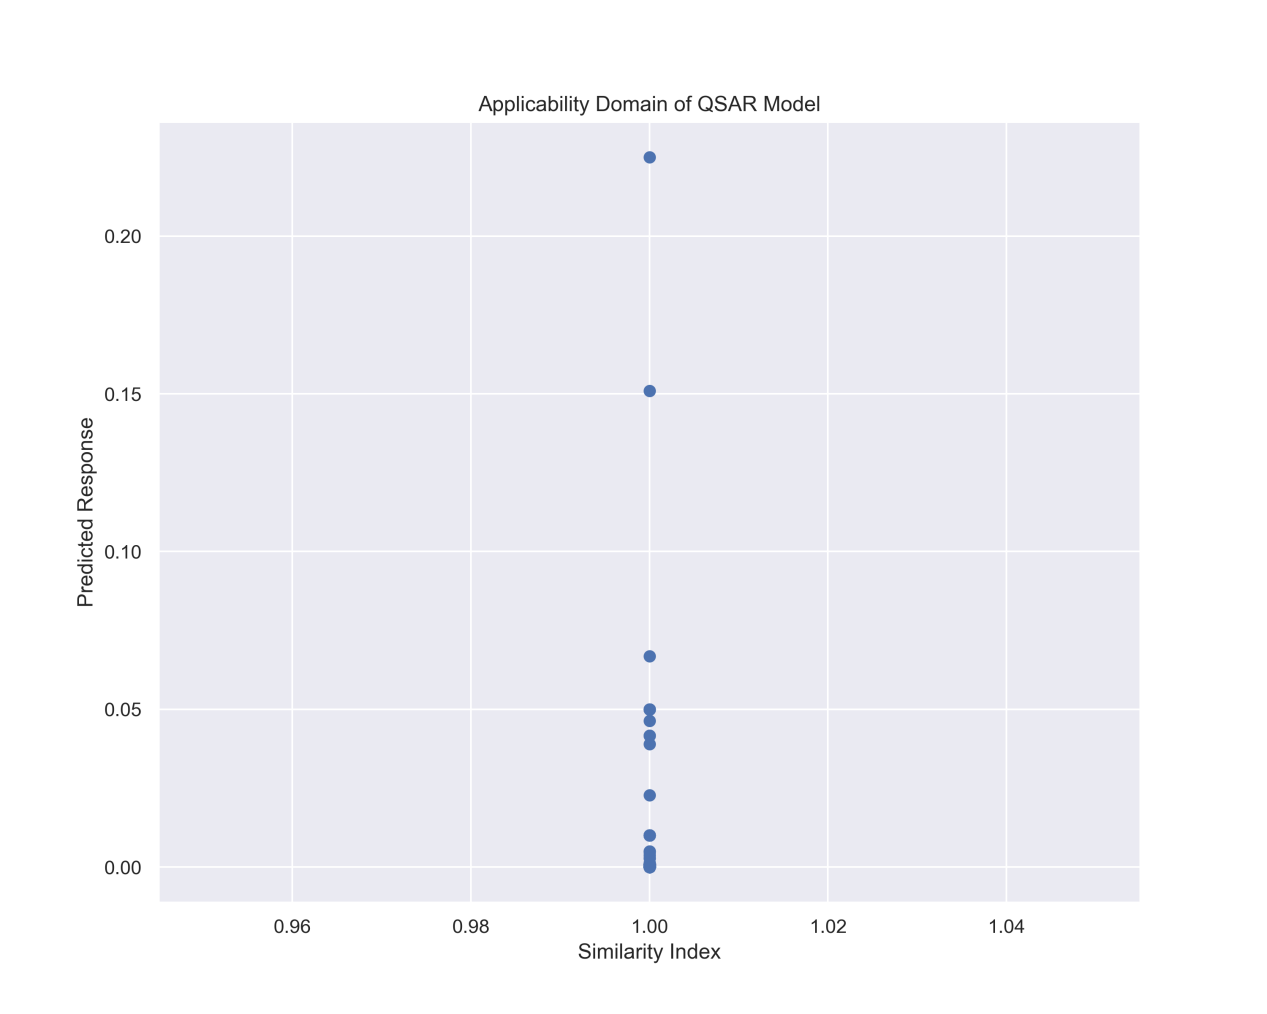


Figure S2: Correlation between predicted *Ki* and similarity index.


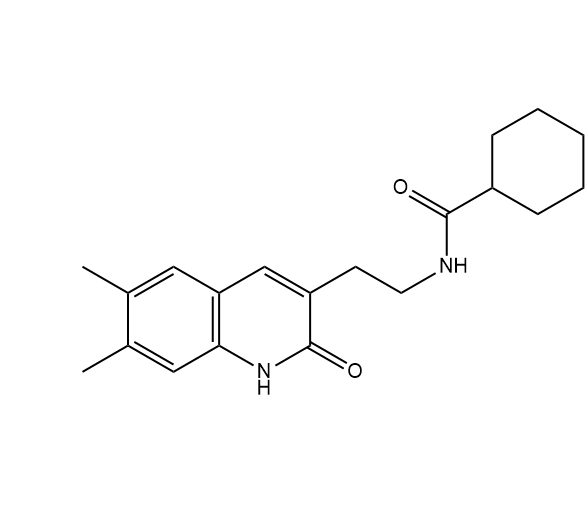


Figure S3 2D representation of Screened Molecule ZINC000000427761


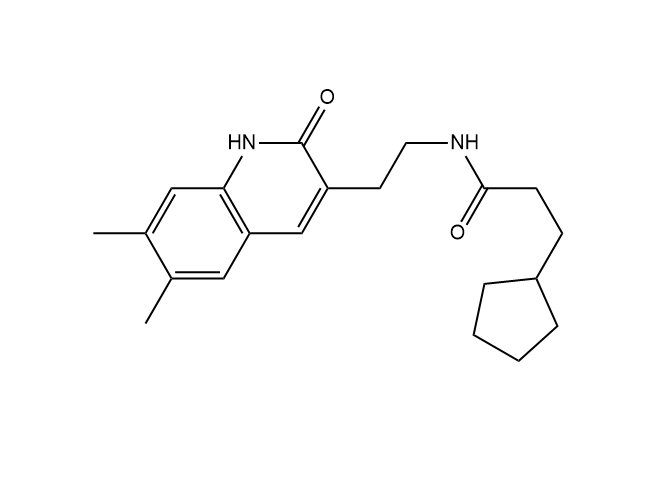


Figure S4 2D representation of Screened Molecule ZINC000000427764


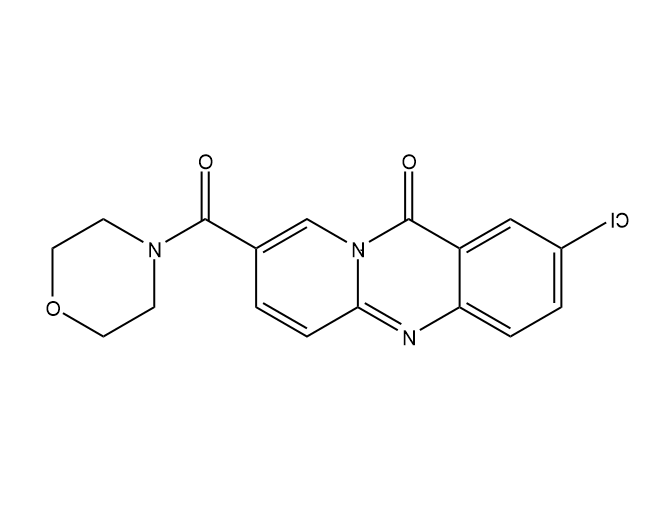


Figure S5: 2D representation of Screened Molecule ZINC000000425581


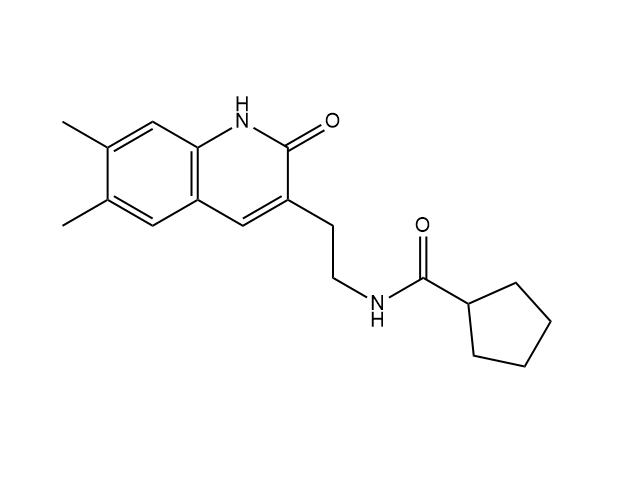


Figure S6 2D representation of Screened Molecule ZINC000000427746

Table S1: RMSE combined result

Table S2: R2

Table S3: ADMET

Table S4: Docking Score

Table S1: RMSE combined result

Table S1: RMSE combined result

| **Models** | **Atom Pairs 2D** | **Atom Pairs 2D Count** | **E State** | **Finger printer** | **Finger printer Extended** | **Finger printer Graph Only** | **Klekota Roth** | **Klekota Roth Count** | **MACCS** | **Pub Chem** | **Sub-structure** | **Sub structure Count** |
| --- | --- | --- | --- | --- | --- | --- | --- | --- | --- | --- | --- | --- |
| **AdaBoost Regressor** | 0.025296 | 0.035692 | 0.0209 | 0.023835 | 0.023021 | 0.019413 | 0.037361 | 0.039902 | 0.028361 | 0.044553 | 0.028888 | 0.029485 |
| **Bagging Regressor** | 0.019913 | 0.033998 | 0.022799 | 0.030036 | 0.022311 | 0.026599 | 0.024774 | 0.042974 | 0.02408 | 0.028878 | 0.024856 | 0.025199 |
| **Decision Tree Regressor** | 0.02060 | 0.038103 | 0.031318 | 0.04718 | 0.023251 | 0.018077 | 0.01368 | 0.014536 | 0.032875 | 0.016357 | 0.024299 | 0.0216 |
| **ExtraTrees Regressor** | 0.020866 | 0.035281 | 0.028373 | 0.032555 | 0.017052 | 0.018059 | 0.014298 | 0.01579 | 0.021469 | 0.034662 | 0.024295 | 0.021829 |
| **Gradient Boosting Regressor** | 0.020525 | 0.023348 | 0.041711 | 0.024359 | 0.022812 | 0.016265 | 0.019025 | 0.014229 | 0.027171 | 0.031799 | 0.027023 | 0.02667 |
| **Hist Gradient Boosting Regressor** | 0.029108 | 0.029728 | 0.034295 | 0.02873 | 0.027459 | 0.031532 | 0.029913 | 0.029777 | 0.02988 | 0.030395 | 0.036391 | 0.03546 |
| **Linear SVR** | 0.050674 | 0.045932 | 0.052681 | 0.041777 | 0.043405 | 0.031777 | 0.023375 | 0.037864 | 0.050843 | 0.035925 | 0.027366 | 0.034524 |
| **Linear Regression** | 2.9E+10 | 70581167 | 0.053375 | 0.045057 | 0.044246 | 9.97E+09 | 5.77E+08 | 41380260 | 4.14E+08 | 2.03E+09 | 1.27E+09 | 12826124 |
| **Voting Regressor** | 9.66E+09 | 23527056 | 0.033446 | 0.029976 | 0.027779 | 3.32E+09 | 1.92E+08 | 13793420 | 1.38E+08 | 6.78E+08 | 4.22E+08 | 4275375 |
| **Stacking Regressor** | 0.028667 | 0.042602 | 0.043569 | 0.047753 | 0.039737 | 0.037395 | 0.034542 | 0.028903 | 0.043857 | 0.042572 | 0.030549 | 0.035801 |

Table S2: R2 Combined Result

| **Models** | **Atom Pairs 2D** | **Atom Pairs 2D Count** | **E State** | **Finger printer** | **Finger printer Extended** | **Finger printer Graph Only** | **Klekota Roth** | **Klekota Roth Count** | **MACCS** | **Pub Chem** | **Sub structure** | **Sub structure Count** |
| --- | --- | --- | --- | --- | --- | --- | --- | --- | --- | --- | --- | --- |
| **Ada Boost Regressor** | 0.767882 | 0.537893 | 0.841542 | 0.79391 | 0.807752 | 0.863287 | 0.493664 | 0.422436 | 0.708217 | 0.27996 | 0.697268 | 0.68464 |
| **Bagging Regressor** | 0.856165 | 0.580721 | 0.811443 | 0.672741 | 0.819423 | 0.743353 | 0.777359 | 0.33009 | 0.789667 | 0.697483 | 0.77589 | 0.76966 |
| **Decision Tree Regressor** | 0.845984 | 0.473355 | 0.644199 | 0.192535 | 0.80389 | 0.881466 | 0.932114 | 0.923349 | 0.60794 | 0.902942 | 0.78582 | 0.830757 |
| **Extra Trees Regressor** | 0.842068 | 0.548461 | 0.707975 | 0.615551 | 0.894517 | 0.881697 | 0.925845 | 0.909562 | 0.832801 | 0.564174 | 0.78589 | 0.827145 |
| **Gradient Boosting Regressor** | 0.847188 | 0.802251 | 0.368869 | 0.784766 | 0.81123 | 0.904033 | 0.868706 | 0.926553 | 0.732194 | 0.633187 | 0.735111 | 0.741974 |
| **Hist Gradient Boosting Regressor** | 0.692656 | 0.679418 | 0.573359 | 0.700571 | 0.726495 | 0.63932 | 0.675413 | 0.678353 | 0.676129 | 0.664872 | 0.519616 | 0.543881 |
| **Linear SVR** | 0.068524 | 0.234692 | -0.00673 | 0.366877 | 0.316588 | 0.633691 | 0.801802 | 0.479924 | 0.062299 | 0.531828 | 0.728337 | 0.567639 |
| **Linear Regression** | -3.04E+23 | -1.81E+18 | -0.03345 | 0.263558 | 0.289839 | -3.60E+22 | -1.21E+20 | -6.21E+17 | -6.23E+19 | -1.50E+21 | -5.82E+20 | -5.97E+16 |
| **Voting Regressor** | -3.38E+22 | -2.01E+17 | 0.594202 | 0.67405 | 0.720084 | -4.01E+21 | -1.34E+19 | -6.90E+16 | -6.92E+18 | -1.67E+20 | -6.47E+19 | -6.6E+15 |
| **Stacking Regressor** | 0.701899 | 0.341628 | 0.311405 | 0.172815 | 0.42721 | 0.492728 | 0.567188 | 0.696971 | 0.302258 | 0.342556 | 0.661473 | 0.535065 |

Table S3: Lipinski evaluation for the compounds from zinc database

| **Molecule ID** | **Molecule SMILE** | **Molecular weight (g/mol)** | **Hydrogen Bond Acceptor** | **Hydrogen Bond Donor** | **Rotatable Bond** | **LogP Partition Coefficient** | **Lipinski Status** |
| --- | --- | --- | --- | --- | --- | --- | --- |
| **ZINC00287783** | c1cc(c(cc1C(=O)N2CCSC2=S)Cl)Cl | 292.212 | 3 | 0 | 1 | 3.4673 | PASS |
| **ZINC00373068** | COc1ccc(cc1C(=O)N(CC#N)CC#N)Cl | 263.684 | 4 | 0 | 4 | 1.83796 | PASS |
| **ZINC00321324** | Cn1cccc1CN(C2CC2)C(=O)c3ccc(c(c3)Cl)Cl | 323.223 | 2 | 0 | 4 | 4.1367 | PASS |
| **ZINC00145150** | Cc1cc(ccc1NC(=S)N(CCO)N)Cl | 259.762 | 3 | 3 | 3 | 1.51322 | PASS |
| **ZINC00029883** | C=CCN(CC=C)C(=O)c1ccc(c(c1)Cl)Cl | 270.159 | 1 | 0 | 5 | 3.8076 | PASS |
| **ZINC00120009** | CNc1ccc(cc1C(=O)NCCc2ccccc2)Cl | 288.778 | 2 | 2 | 5 | 3.3542 | PASS |
| **ZINC00614575** | c1cc(oc1)CNC(=O)[C@H]2CC(=NO2)c3ccc(c(c3)Cl)Cl | 339.178 | 4 | 1 | 4 | 3.3958 | PASS |
| **ZINC00346296** | CC(C)COc1ccc(cc1Cl)CNC(=[NH2+])N | 256.757 | 1 | 3 | 5 | 0.5382 | PASS |
| **ZINC00122608** | Cc1cc(ccc1OCC(=O)NCc2ccco2)Cl | 279.723 | 3 | 1 | 5 | 2.93662 | PASS |
| **ZINC00543430** | CC(=O)Nc1ccc(cc1)N2Cc3cc(ccc3OC2)Cl | 302.761 | 3 | 1 | 2 | 3.6549 | PASS |
| **ZINC00441511** | C=CCN(CC=C)C(=O)c1cc(ccc1[N+](=O)[O-])Cl | 280.711 | 3 | 0 | 6 | 3.0624 | PASS |
| **ZINC00614576** | c1cc(oc1)CNC(=O)[C@@H]2CC(=NO2)c3ccc(c(c3)Cl)Cl | 339.178 | 4 | 1 | 4 | 3.3958 | PASS |
| **ZINC00060713** | c1cc(c(cc1Cl)C(=O)N(CC#N)CC#N)Cl | ­268.103 | 3 | 0 | 3 | 2.48276 | PASS |
| **ZINC00375666** | Cc1cc(ccc1OCC(=O)NCc2cccs2)Cl | 295.791 | 3 | 1 | 5 | 3.40512 | PASS |
| **ZINC00060712** | C=CCN(CC=C)C(=O)c1cc(ccc1Cl)Cl | 270.159 | 1 | 0 | 5 | 3.8076 | PASS |
| **ZINC00116077** | CCc1ccc(cc1)[C@@H]2C(=C(NC(=O)N2)C)C(=O)OC[C@@H]3CCCO3 | 344.411 | 4 | 2 | 5 | 2.5991 | PASS |
| **ZINC00427746** | Cc1cc2cc(c(=O)[nH]c2cc1C)CCNC(=O)C3CCCC3 | 312.413 | 2 | 2 | 4 | 2.99384 | PASS |
| **ZINC00427761** | Cc1cc2cc(c(=O)[nH]c2cc1C)CCNC(=O)C3CCCCC3 | 326.44 | 2 | 2 | 4 | 3.38394 | PASS |
| **ZINC00116063** | CCc1ccc(cc1)[C@@H]2C(=C(NC(=O)N2)C)C(=O)OC[C@H]3CCCO3 | 344.411 | 4 | 2 | 5 | 2.5991 | PASS |
| **ZINC00116070** | CCc1ccc(cc1)[C@H]2C(=C(NC(=O)N2)C)C(=O)OC[C@@H]3CCCO3 | 344.411 | 4 | 2 | 5 | 2.5991 | PASS |
| **ZINC00116051** | CCc1ccc(cc1)[C@H]2C(=C(NC(=O)N2)C)C(=O)OC[C@H]3CCCO3 | 344.411 | 4 | 2 | 5 | 2.5991 | PASS |
| **ZINC00427764** | Cc1cc2cc(c(=O)[nH]c2cc1C)CCNC(=O)CCC3CCCC3 | 340.467 | 2 | 2 | 6 | 3.77404 | PASS |
| **ZINC00202301** | CCN(CC)C(=O)[C@@H]1CCC[NH+](C1)Cc2ccc(o2)Br | 344.273 | 2 | 1 | 5 | 1.7054 | PASS |
| **ZINC00973914** | CC1(CC(CC([NH+]1C)(C)C)NC(=O)c2cc[nH]n2)C | 265.381 | 2 | 3 | 2 | 0.3738 | PASS |
| **ZINC00131506** | c1cc(ccc1[C@H]2C[C@@]23C(=O)C4CC[NH+]3CC4)C(F)(F)F | 296.312 | 1 | 1 | 1 | 1.8091 | PASS |
| **ZINC00181407** | COc1cccc(c1)N2C(=O)C[C@@H](C2=O)[NH+]3CCC(CC3)C(=O)N | 332.38 | 4 | 2 | 4 | -0.8927 | PASS |
| **ZINC00088514** | C[C@@]12C(c3ccccc3N1CC(=O)N2CC=C)(C)C | 256.349 | 2 | 0 | 2 | 2.5286 | PASS |
| **ZINC00131502** | c1cc(ccc1[C@H]2C[C@]23C(=O)C4CC[NH+]3CC4)C(F)(F)F | 296.312 | 1 | 1 | 1 | 1.8091 | PASS |
| **ZINC00448379** | COc1ccccc1C[C@H]2/C(=N/O)/C3CC[NH+]2CC3 | 261.345 | 3 | 2 | 3 | 0.745 | PASS |
| **ZINC00202297** | CCN(CC)C(=O)[C@H]1CCC[NH+](C1)Cc2ccc(o2)Br | 344.273 | 2 | 1 | 5 | 1.7054 | PASS |
| **ZINC00077502** | c1ccc(c(c1)N2C(=O)C[C@@H](C2=O)[NH+]3CCC(CC3)C(=O)N)F | 320.344 | 3 | 2 | 3 | -0.7622 | PASS |
| **ZINC00404802** | C=C[C@H]1C[NH+]2CC[C@H]1C[C@@H]2[C@@H](c3ccnc4c3cccc4)O | 295.406 | 2 | 2 | 3 | 1.7475 | PASS |
| **ZINC00199521** | CCN(CC)C(=O)[C@@H]1CCC[NH+](C1)Cc2ccoc2 | 265.377 | 2 | 1 | 5 | 0.9429 | PASS |
| **ZINC00199517** | CCN(CC)C(=O)[C@H]1CCC[NH+](C1)Cc2ccoc2 | 265.377 | 2 | 1 | 5 | 0.9429 | PASS |
| **ZINC00088515** | C[C@]12C(c3ccccc3N1CC(=O)N2CC=C)(C)C | 256.349 | 2 | 0 | 2 | 2.5286 | PASS |
| **ZINC00049419** | c1ccc(c(c1)N2C(=O)C[C@@H](C2=O)[NH+]3CCC(CC3)C(=O)[O-])F | 320.32 | 4 | 1 | 3 | -1.4976 | PASS |
| **ZINC00309819** | COc1ccccc1N2C(=O)C[C@@H](C2=O)[NH+]3CCC(CC3)C(=O)N | 332.38 | 4 | 2 | 4 | -0.8927 | PASS |
| **ZINC00345627** | CC[C@H]1C[C@H]2CC[NH+]1[C@@H](C2)[C@@H](c3ccnc4c3cccc4)O | 297.422 | 2 | 2 | 3 | 2.114 | PASS |
| **ZINC00140039** | CC(=O)N1[C@H]2C[C@@H](C1(C(F)(F)F)C(F)(F)F)C=C2 | 273.176 | 1 | 0 | 0 | 2.6566 | PASS |
| **ZINC00140041** | CC(=O)N1[C@@H]2C[C@H](C1(C(F)(F)F)C(F)(F)F)C=C2 | 273.176 | 1 | 0 | 0 | 2.6566 | PASS |
| **ZINC00062524** | c1cc(ccc1N2C(=O)C[C@@H](C2=O)[NH+]3CCC(CC3)C(=O)[O-])Cl | 336.775 | 4 | 1 | 3 | -0.9833 | PASS |
| **ZINC00062531** | c1cc(cc(c1)Cl)N2C(=O)C[C@@H](C2=O)[NH+]3CCC(CC3)C(=O)N | 336.799 | 3 | 2 | 3 | -0.2479 | PASS |
| **ZINC00062619** | COc1ccc(cc1)N2C(=O)C[C@@H](C2=O)[NH+]3CCC(CC3)C(=O)[O-] | 332.356 | 5 | 1 | 4 | -1.6281 | PASS |
| **ZINC00315900** | CCC[NH+](CC1CC1)[C@@H]2CC(=O)N(C2=O)c3ccccc3 | 287.383 | 2 | 1 | 6 | 1.0234 | PASS |
| **ZINC00064035** | COC(=O)N1[C@H]2C[C@@H](C1(C(F)(F)F)C(F)(F)F)C=C2 | 289.175 | 2 | 0 | 0 | 2.8765 | PASS |
| **ZINC00064037** | COC(=O)N1[C@@H]2C[C@H](C1(C(F)(F)F)C(F)(F)F)C=C2 | 289.175 | 2 | 0 | 0 | 2.8765 | PASS |
| **ZINC00425581** | c1cc2c(cc1Cl)c(=O)n3cc(ccc3n2)C(=O)N4CCOCC4 | 343.77 | 5 | 0 | 1 | 1.9735 | PASS |
| **ZINC00056950** | C=C[C@@H]1C[NH+]2CC[C@@H]1C[C@H]2[C@@H](c3ccnc4c3cccc4)O | 295.406 | 2 | 2 | 3 | 1.7475 | PASS |
| **ZINC00586523** | C=C[C@@H]1C[NH+]2CC[C@@H]1C[C@H]2[C@H](c3ccnc4c3cccc4)O | 295.406 | 2 | 2 | 3 | 1.7475 | PASS |
| **ZINC00967791** | C=C[C@@H]1C[NH+]2CC[C@@H]1C[C@@H]2[C@@H](c3ccnc4c3cccc4)O | 295.406 | 2 | 2 | 3 | 1.7475 | PASS |

***Table S4: Docking score result for SSRI SERT binding with the potential inhibitors.***

| **Ligand** | **Binding Affinity (kcal/mol) 7LWD** | **Interactions** | **Distance** |
| --- | --- | --- | --- |
| **ZINC00427761** | -10.9 | LEU 99, ILE 172, PHE 335, PHE 341, VAL 343 | 5.28, 3.21, 3.67, ( 4.21, 4.02), 3.93 |
| **ZINC00427746** | -10.8 | **ASP 98**, LEU 99, **GLY 100**, ILE 172, TYR 176, **PHE 335**, PHE 341, VAL 343 | 3.07, 4.93, 2.50, 5.20, 5.43, 2.98, ( 4.10, 4.19), 4.07 |
| **ZINC00425581** | -10.6 | ASP 98, LEU 99, TRP 103, ALA 169, **PHE 335** | ( 3.3, 3.7), ( 4.17, 5.50), 5.49, 3.79, 1.88 |
| **ZINC00427764** | -10.1 | ILE 172, TYR 176, PHE 341 | ( 5.25, 5.48, 4.07, ( 3.98, 4.24) |
| **Escitalopram** | -10.1 | TYR 95, ASP 98, ALA 169, ILE 172, PHE 341 | 2.02, 4.82, 5.43, ( 5.10, 5.12), ( 3.07, 3.28) |
| **Paroxetine** | -10.1 | ASP 98, ILE 172 SER 438, THR 439, GLY 442 | 3.39, 4.99, 3.21, 3.61, ( 2.09, 3.16) |
| **ZINC00131506** | -9.9 | ASP 98, ALA 169, ILE 172, **PHE 335**, PHE 341-, GLY 442 | 4.29, 3.98, 5.21, 2.51, ( 3.07, 3.28), ( 3.07, 3.28) |
| **ZINC00056950** | -9.8 | ASP 98, ALA 169, ILE 172, **PHE 335**, SER 438 | 2.55, 5.32, ( 3.94, 5.41), ( 4.07, 3.28), 3.75 |
| **ZINC00404802** | -9.7 | ASP 98, ALA 169, ILE 172, **PHE 335**, PHE 341, VAL 501 | ( 2.96, 2.00), ( 4.81, 4.83, 4.41), ( 4.28, 2.99), ( 4.25, 4.83), 3.81  4.83, |
| **ZINC00586523** | -9.7 | TYR 95, ASP 98, ALA 169, ILE 172, ALA 173, TYR 176, **PHE 335**, PHE 341 | 2.2, ( 4.33, 3.31), 5.14, ( 3.57, 4 .66), 5.39, 5.11, 3.73, 4.83  4.83, |
| **ZINC00967791** | -9.6 | ASP 98, ALA 169, ILE 172, TYR 176, **PHE 335**, PHE 341, VAL 501 | 3.07, 5.04, 3.78, 4.75, ( 4.32, 3.37), 4.21, 3.83 |
| **ZINC00309819** | -9.5 | ASP 98, **PHE 335**, PHE 341, GLY 442 | ( 4.67, 4.54), 4.74, 2.45, 3.51 |
| **ZINC00077502** | -9.4 | ASP 98, ILE 172, PHE 341, THR 497 | ( 5.14, 3.92), 5.17, 2.14 |
| **ZINC00116063** | -9.4 | **TYR 95, ASP 98**, ALA 169, ILE 172, PHE 341, GLY 442 | 2.26, 2.75, 4.59, ( 4.00, 4.88), ( 3.98, 5.14), 3.48 |
| **ZINC00062531** | -9.3 | ASP 98, PHE 335, ILE 172, PHE 341, **GLY 442** | ( 3.49, 4.58), 4.72, 2.37 |
| **ZINC00120009** | -9.3 | **TYR 95,** ILE 172, ALA 173, TYR 176, PHE 335, PHE 341, VAL 501 | ( 2.54, 4.70), ( 4.71, 5.12), 4.41, 5.35, ( 4.26, 3.67), ( 3.86, 4.43), 4.34 |
| **ZINC00614576** | -9.3 | LEU 99, ILE 165, ILE 168, ALA 169, ILE 172, TYR 176, PHE 341, VAL 343, GLU 493 | 4.85, 5.26, 4.93, 3.94, ( 4.42, 5.35), 5.23, ( 4.41, 5.35), 4 .22, 4.29 |
| **Citalopram (ZINC000003794601)** | -9.3 | TYR 95, ASP 98, ILE 172, TYR 176, PHE 341, SER 438, THR 439 | 2.74, 4.47, 5.15, 4.90, ( 3.41, 5.32,), 3.25, 2.40 |
| **ZINC00062524** | -9.2 | ASP 98, ARG 104, ALA 169, ILE 172, GLU 493 | 5.42, 5.28, 3.98, 4.14, 4.99, 2.16 |
| **ZINC00088514** | -9.2 | ALA 169, ILE 172, ALA 173, PHE 335, PHE 341 | 5.42, 5.28, 3.98, 4.14, 4.99, 2.16 |
| **ZINC00181407** | -9.2 | ASP 98, ARG 104, TYR 176, GLN 332, PHE 335 | 2.29, 2.66, 4.62, 3.43, 4.62 |
| **ZINC00543430** | -9.2 | ASP 98, ARG 104, ALA 169, ILE 172, ALA 173 PHE 341, LEU 443 | 3.8, 4.75, ( 5.25, 3.62), ( 3.75, 4.85, 4.97), 4.20, ( 5.13, 3.41), 5.15 |
| **ZINC00614575** | -9.2 | ILE 165, ILE 168, ALA 169, ILE 172, PHE 341, VAL 343 | 5.33, 5.34, 4.08, ( 4.88, 4.32), ( 4.44, 4.32), 4.34  5 |
| **ZINC00049419** | -9.1 | ASP 98, ARG 104, ILE 172, GLU 493 | 4.91, 3.27, 5.21, 1.87 |
| **ZINC00116077** | -9.1 | TYR 95, ASP 98, ILE 172 | 2.29, 2.32, 5.36 |
| **ZINC00131502** | -9.1 | ASP 98, ILE 172, PHE 341 | ( 3.13, 3.79) ( 4.50, 5.11), 3.89 |
| **ZINC00345627** | -9.1 | ASP 98, ALA 169, ILE 172, TYR 175, PHE 335, PHE 341, VAL 501 | ( 3.7, 5.42), ( 4.71, 5.12), 4.41, 5.35, (4.26, 3.67), ( 3.86, 4.43), 4.34 |
| **Fluoxetine (ZINC000001530637)** | -9.1 | TYR 95, ALA 169, ILE 172, PHE 335, SER 336, PHE 341 | 4.24, 4.54, ( 5.56, 5.95), 5.71, 4.99, 5.56 |
| **Sertraline (ZINC000001853550)** | -9.1 | TYR 95, ALA 96, ASP 98, ALA 169, ILE 172, ALA 173, TYR 176, PHE 335, SER 336, LEU 443 | 5.36, 3.68, 2.76, 3.78, 3.67, (3.33, 3.68), 5.71, 2.11, 3.11, 3.33 |
| **ZINC00062619** | -9 | ASP 98, ARG 104, ILE 165, ALA 169, ILE 172, PHE 341, GLU 493 | 5.26, 4.96, 4.68, 3.76, 3.94, 5.04, 2.37 |
| **ZINC00116051** | -9 | ILE 172, PHE 341, SER 438, THR 439, GLY 442 | 5.05, 4.54, 2.18, 3.76 |
| **ZINC00116070** | -9 | ALA 169, ILE 172, ALA 173, PHE 335, GLY 338, PHE 341, SER 438, LEU 443 | ( 3.7, 5.42), ( 5.13, 5.36), 4.38, 2.98, 3.64, 4.52, 2.24, 5.22 |
| **ZINC00122608** | -8.6 | TYR 95, ILE 165, ILE 168, ALA 169, ILE 172, ALA 173, PHE 341, SER 438, THR 439, GLY 442 | 2.26, 4.72, 5.45, 3.46, ( 5.33, 5.23), 4.64, ( 4.38, 3.73), 2.31, 3.94 |
| **ZINC00346296** | -8.6 | ALA 96, ASP 98, ILE 172, ALA 173, PHE 335, SER 336, LEU 337, PHE 341, GLY 442, LEU 443 | ( 2.33, 2.5), ( 2.6, 2.9, 4.9), ( 4.30, 5.48), 2.77, ( 2.16, 2.71), 2.78, 4.09, 3.32, 3.99 |
| **ZINC00375666** | -8.6 | TYR 95, ILE 165, ILE 168, ILE 169, ILE 172, ALA 173, TYR 176, PHE 341, SER 438 | 2.33, 4.71, 5.38, 3.54, ( 3.89, 5.34), 4.54, 5.62, ( 3.78, 4.35), 2.26 |
| **ZINC00088515** | -8.5 | TYR 95, ALA 169, ILE 172, ALA 173, PHE 341, GLY 442, | 2.37, 5.26, 5.07, 4.57, 4.54, 4.16 |
| **ZINC00448379** | -8.5 | TYR 95, ASP 98, ILE 172, TYR 175, PHE 336, PHE 341, GLU 493 | 5.13, ( 3.05, 5.27), 4.35, 1.82, ( 2.41, ), 4.82, 5.12 |
| **ZINC00315900** | -8.4 | TYR 95, ASP 98, ALA 169, ILE 172, PHE 335, PHE 341, | ( 2.24, 3.75), ( 1.94, 5.29), 4.43, ( 2.24, 5.29), 4.52, ( 3.94, 3.98) |
| **ZINC00973914** | -8.4 | ASP 98 | 1.98 |
| **ZINC00321324** | -8.3 | TYR 95, ASP 98, ALA 169, ILE 172, ALA 173, TYR 176, PHE 335, PHE 341, SER 438 | 4.07, 3.70, 1.94, 4.82, 4.27, 4.5, 4.93, 5.06, 4.21, 2.19) |
| **ZINC00064037** | -8 | TYR 95, ASP 98, ALA 169, ILE 172, TYR 176, PHE 341, SER 438, GLY 442, | 5.13, 3.10, 3.68, ( 4.93, 5.09), 3.96, 4.00, ( 2.13, 2.79), 3.17 |
| **ZINC00140041** | -8 | TYR 95, ILE 172, TYR 176, PHE 341, VAL 343, GLY 442 | ( 2.17, 5.14), 4.56, 5.27,( 3.52, 4.32, 4.32), 4.66, 3.16 |
| **ZINC00287783** | -7.9 | TYR 95, ASP 98, ILE 172, ALA 173, PHE 335, PHE 341, SER 438, LEU 443 | 4.60, 3.51, ( 5.14, 5.46), 3.94, 4.95, 5.28, 1.85, 5.12 |
| **ZINC00064035** | -7.8 | ALA 169, ILE 172, PHE 341, VAL 343, GLY 442 | ( 3.52, 3.56), ( 4.30, 5.01), ( 3.09, 4.75, 5.11), 4.49, ( 2.99, 3.22) |
| **ZINC00140039** | -7.8 | TYR 95, ASP 98, ILE 172, PHE 341, SER 438, GLY 442 | 4.94, ( 2.95, 3.27, 3.46, 3.69), ( 5.13, 4.85), 3.65, ( 2.28, 3.32), 3.74, |
| **ZINC00202297** | -7.8 | ASP 98, ILE 172, ALA 173, PHE 335, PHE | 4.56, 5.27,( 3.52, 4.32, 4.32 |
| **ZINC00202301** | -7.8 | ILE 168, ALA 169, ILE 172, PHE 341, | 3.98, 4.14, 4.99, 2.16 |
| **ZINC00060713** | -7.7 | ILE 172, ALA 173, PHE 335 PHE 341, SER 438, VAL 501 | ( 4.04, 4.95), 3.03, ( 4.03, 4.35), 1.95, 4.23 |
| **ZINC00373068** | -7.7 | TYR 95, ASP 98, ILE 172, ALA 173, PHE 335 PHE 341, SER 438 | 2.20, 3.50, 4.92, 3.06, 4.04, ( 4.53, 3.97), 2.06 |
| **ZINC00199521** | -7.6 | TYR 95, ALA 169, ILE 172, PHE 335 PHE 341, GLY 442 | 4.19, 4.06, 4.81, 4.87, 4.41, 4.19 |
| **ZINC00145150** | -7.5 | TYR 95, ASP 98, ILE 165, ILE 168, ALA 1­69, ILE 172, VAL 343,­ PHE 341, VAL 446, | ( 2.11, 2.54), 5.28, 4.28, 5.37, 3.27, 5.37, 4.47, ( 3.63, 4.57, 5.37), 5.45 |
| **ZINC00441511** | -7.4 | TYR 95, ALA 169, ILE 172, ALA 173, TYR 176, PHE 341, SER 438, GLY 442, LEU 443, | 4.00, 3.62, 3.68, ( 3.52, 4.78), ( 4.23, 4.78), 2.01, 3.61, 4.36 |
| **ZINC00029883** | -7.3 | TYR 95, ALA 169, ILE 172, ALA 173, TYR 176, PHE 341, SER 438, LEU 443 | 4.38, 3.95, 3.64, 3.47, ( 2.97, 5.36), 4.38, 2.41, 4.48 |
| **ZINC00060712** | -7.2 | ALA 169, ILE 172, ALA 173, TYR 176, PHE 335, PHE 341, LEU 443, VAL 501 | 4.08, (4.02, 4.34), 4.07, 3.36, 4.09, (4.02,4.34), 5.19, 4.25 |
| **ZINC00199517** | -7.2 | ASP 98, LEU 99, ALA 169, ILE 172, TYR 175, TYR 176, PHE 335, PHE 341 | 5.29, 5.04, 4.72, 4.89, 3.51, 5.06, 3.46, 4.55, |

Salt bridge Alkyl or Pi-Alkyl Pi-Sigma Carbon Hydrogen Bond Conventional Hydrogen Bond Pi-Pi

Pi-Anion Attractive Charge Halogen Pi-Cation

Pi

Pi
